# Supplementary material for: A Hybrid Likelihood Model for Sequence-Based Disease Association Studies
Source: PLOS journal article supplement (doi:10.1371/journal.pgen.1003224), 2013-01-24

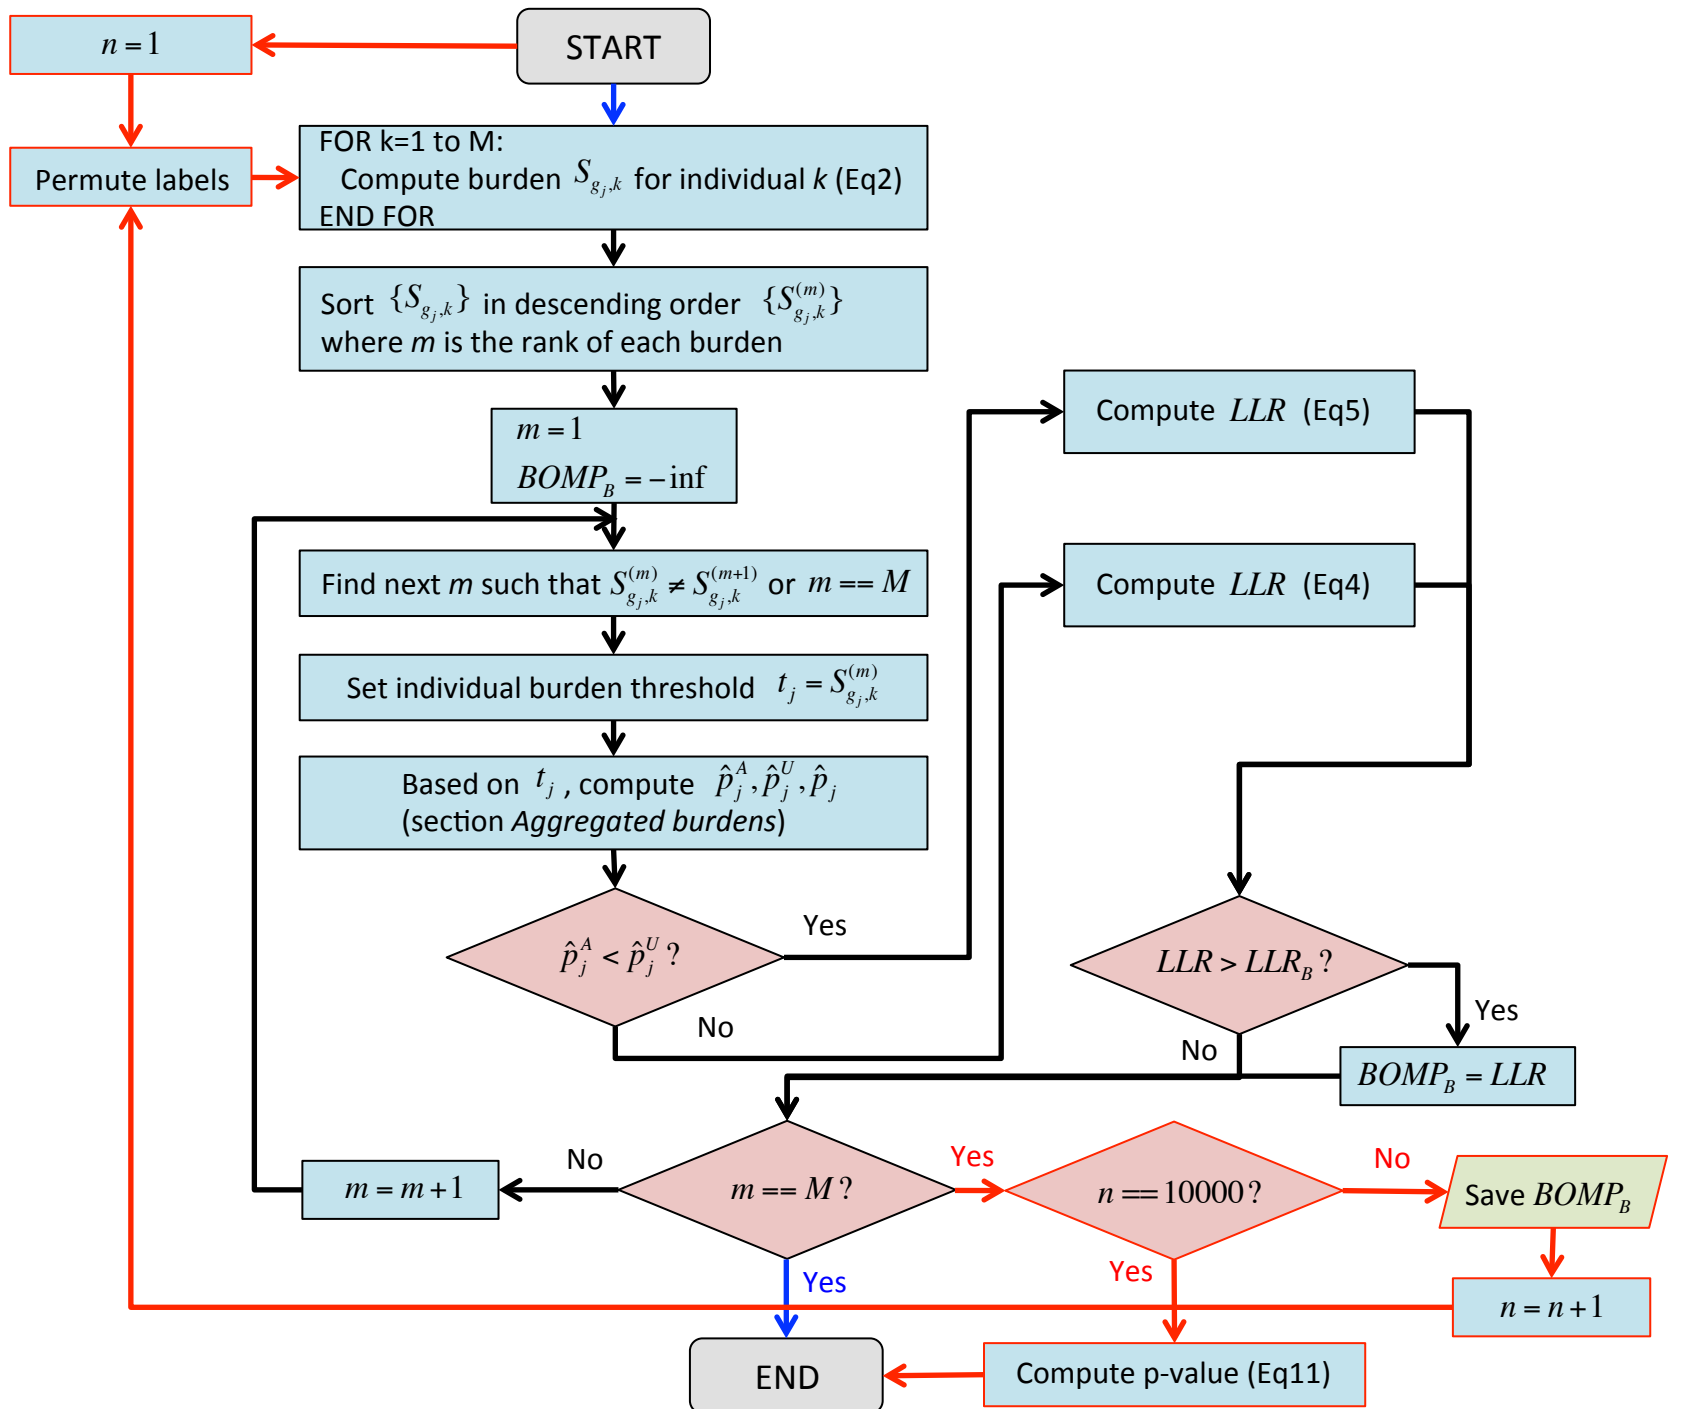

Supplement: S8 (10.1371/journal.pgen.1003224.s008) [file journal.pgen.1003224.s008]
